# Supplementary material
Source: publisher figshare collection journal article supplement (https://future-science-group.figshare.com/articles/dataset/_/20291205)
Supplement: Supplementary file 1 [file 1]

## Sheet: Table_S1
Supplementary table 1: Patient sample collection details
Patient ID	Treatment at visit A	Plasma volume at Visit A (mL)	Plasma volume at Visit B (mL)	Plasma volume at Visit C (mL)	A to B (weeks)	B to C (weeks)	TTPP (weeks)	A to C/TTCP (weeks)	Prior sequencing analysis status/prior study ID*
P1	Enzalutamide	NC	4	5	12	71	49	83	Y (P1)
P2	Enzalutamide	4	4	NC	17	120	122	137	Y (P2)
P3	Enzalutamide	4	4	4	14	44	54	58	Y (P3)
P4	Enzalutamide	4	4	3.8	12	9	12	21	Y (P4)
P5	Abiraterone	4	4	5	16	215	168	231	N
P6	Enzalutamide	1	4.4	1	11	34	23	45	Y (P6)
P7	Enzalutamide	3.9	3.25	4	13	101	90	114	Y (P7)
P8	Enzalutamide	4	4	3	10	68	44	78	Y (P8)
P9	Abiraterone	3.6	4.5	4	9	69	62	78	Y (P9)
P10	Abiraterone	5	5	NC	25	N/A	197	NR	N
P11	Enzalutamide	2	5	NC	11	8	NR	19	Y (P12)
P12	Enzalutamide	4	4	5	12	119	61	131	N
P13	Enzalutamide	4	4	4	16	65	55	81	Y (P15)
P14	Enzalutamide	4	4.8	5	18	109	83	127	N
P15	Enzalutamide	5	5	NC	14	N/A	NR	NR	N
P16	Enzalutamide	5.7	6	5	10	153	80	163	N
P17	Enzalutamide	5	4	NC	13	N/A	NR	NR	N
P18	Enzalutamide	4	4	5	4	144	101	148	N
P19	Enzalutamide	4	4	5	12	180	191	192	N
P20	Enzalutamide	4.9	4	4	15	143	133	158	N
P21	Enzalutamide	4	3.5	NC	13	24	26	37	Y (P26)
P22	Abiraterone	4.8	4	5	14	6	20	20	Y (P28)
P23	Abiraterone	4	4	4	16	37	31	53	Y (P31)
P24	Enzalutamide	5	5	NC	15	N/A	NR	NR	N
P25	Enzalutamide	4	4	5	13	95	72	108	N
P26	Enzalutamide	4	4	6	12	75	82	87	N
P27	Abiraterone	NC	NC	4.8	7	N/A	5	7	Y (P36)
P28	Enzalutamide	5	4.4	2	13	11	5	24	Y (P37)
P29	Enzalutamide	4.5	3.5	5.8	10	28	26	38	Y (P38)
P30	Enzalutamide	4	4	NC	14	209	96	223	N
P31	Abiraterone	NC	4	5	10	59	59	69	N
P32	Enzalutamide	5	4	4	21	64	46	85	N
P33	Enzalutamide	4	4	5	12	82	52	94	N
P34	Abiraterone	4	4	4	9	19	19	28	N
P35	Abiraterone	4	3	5	9	66	54	75	N
P36	Enzalutamide	4	4	5	11	24	35	35	N
P37	Enzalutamide	5	5	4	18	12	11	30	N
P38	Abiraterone	5	4	NC	11	N/A	NR	NR	N
P39	Enzalutamide	1.2	1	NC	15	12	N/A	27	N
P40	Enzalutamide	1.2	1	NC	16	3	N/A	19	N
P41	Enzalutamide	1.5	1	NC	13	26	N/A	39	N
P42	Enzalutamide	4.125	NC	NC	N/A	N/A	NR	NR	N
P43	Enzalutamide	NC	NC	6.75	N/A	N/A	N/A	N/A	N
P44	Enzalutamide	NC	NC	1.875	N/A	N/A	N/A	N/A	N
P45	Enzalutamide	NC	NC	1.875	N/A	N/A	N/A	N/A	N
P46	Abiraterone	NC	NC	5	N/A	N/A	N/A	N/A	N
P47	Enzalutamide	NC	NC	5	N/A	N/A	N/A	N/A	N
P48	Abiraterone	NC	NC	4.25	N/A	N/A	N/A	N/A	N
P49	Enzalutamide	NC	NC	4.5	N/A	N/A	N/A	N/A	N
NC = Sample not collected/available
N/A = Data not available
NR = Progression was not reached during study follow-up
TTPP = Time to PSA progression
TTCP = Time to clinical progression
*Samples from 16 patients were also previously analyzed using genome-wide sequencing analysis (Peter MR et al, 2020). Any remaining plasma was used in this study for ddPCR analysis (if available). The study ID from the previous publication is shown here to link overlapping patients between the two studies.

## Sheet: Table_S2
Supplementary table 2: Summary of canadidated methylated regions
Region	GRCh37 coordinates	Region/Gene	Total CpGs in ddPCR assay	Detectable in Non-Bisulfite converted DNA?	Duplex assay with other regions?	Region overlapped with CRPC-NE CpGs?
R1	chr2:106959820-106960030	Intergenic	6	No	Y, R7	Yes
R2	chr17:80038278-80038675	Gene body/FASN	7	No	Y, R3	Yes
R3	chr19:48219832-48220206	Gene body/ EHD2	7	No	Y, R2	Yes
R5	chr10:134884427-134884646	CGI/GPR123	8	No	N	Yes
R6	chr11:2431552-2431759	Gene body/TRPM5	7	No	N	Yes
R7	chr1:1618577-1618837	Gene body/CDK11B	10	No	Y, R1	No
R8	chr9:136335642-136335983	Gene body/CACFD1	6	No	Y, R10	No
R10	chr1:88208116-88208453	Intergenic	7	No	Y, R8	Yes
R11	chr19:3825093-3825516	Gene body/ZFR2	7	No	N	Yes

## Sheet: Table_S3
Supplementary table 3: Spearman correlation, Cox proportional hazards (univariate) and logistic regression analysis results
		TTCP Spearman Corelation		TTPP Spearman Corelation		Cox proportional hazards analysis for TTCP with PSA						Logistic Regression (TTCP <= 25wks)			Logistic Regression (TTCP <= 30wks)			Logistic Regression (TTCP <= 35wks)			Logistic Regression (TTCP <= 52wks)
Region	Visit	rho	P-value	rho	P-value	Region HR	Region 95% CI	Region P-value	PSA HR	PSA 95% CI	PSA P-value	OR	95% CI	P-value	OR	95% CI	P-value	OR	95% CI	P-value	OR	95% CI	P-value
R1	A	-0.409995	0.0178	-0.166222	0.38	1.274	0.87-1.86	0.207	1.003	1.00-1.01	0.352	1.75	0.60-5.06	0.3	2.29	0.82-6.41	0.11	1.81	0.77-4.30	0.18	3.4	1.24-9.31	0.018
	B	-0.418126	0.01244	-0.299955	0.1073	2.099	1.08- 4.07	0.0281	1.014	1.00-1.03	0.0813	1.15	0.30-4.38	0.83	1.9	0.50-7.30	0.35	2.89	0.73-11.53	0.13	7.17	1.42-36.24	0.017
	C	0.278606	0.1433	N/A	N/A	0.4792	0.17-1.37	0.1694	1.01	1.00-1.01	0.0721	N/A	N/A	N/A	N/A	N/A	N/A	N/A	N/A	N/A	N/A	N/A	N/A
R2	A	-0.367374	0.03545	-0.0896751	0.6375	1.216	0.86-1.72	0.27	1.003	1.00-1.01	0.292	1.35	0.53-3.48	0.53	1.71	0.71-4.10	0.23	1.59	0.72-3.52	0.25	2.51	1.07-5.90	0.034
	B	-0.530747	0.001038	-0.32777	0.07703	2.042	1.13-3.68	0.0174	1.01	1.00-1.03	0.0484	2.21	0.50-9.75	0.29	3.56	0.81-15.73	0.094	4.84	1.08-21.58	0.039	10.89	1.88-63.07	0.0077
	C	0.342653	0.06882	N/A	N/A	0.4546	0.16-1.30	0.14	1	1.00-1.01	0.309	N/A	N/A	N/A	N/A	N/A	N/A	N/A	N/A	N/A	N/A	N/A	N/A
R3	A	-0.376567	0.03077	-0.106809	0.5743	1.202	0.85-1.70	0.3	1.003	1.00-1.01	0.313	1.57	0.59-4.21	0.37	1.99	0.78-5.07	0.15	1.62	0.73-3.59	0.24	2.63	1.09-6.36	0.032
	B	-0.521362	0.00132	-0.335336	0.07006	2.438	1.22-4.86	0.0113	1.01	1.00-1.03	0.1383	1.74	0.44-6.82	0.43	3.19	0.78-13.11	0.11	4.77	1.11-20.43	0.035	13.74	2.13-88.65	0.0059
	C	0.273925	0.1505	N/A	N/A	0.4879	0.17-1.41	0.1837	1.01	1.00-1.01	0.0662	N/A	N/A	N/A	N/A	N/A	N/A	N/A	N/A	N/A	N/A	N/A	N/A
R5	A	-0.382417	0.02807	-0.101914	0.592	1.15	0.81-1.63	0.428	1.003	1.00-1.01	0.265	1.79	0.63-5.08	0.27	2.13	0.800-5.64	0.13	1.62	0.73-3.62	0.24	2.78	1.12-6.91	0.028
	B	-0.489284	0.002855	-0.25968	0.1658	1.675	1.06-2.65	0.0273	1.02	1.00-1.03	0.0386	2.07	0.54-7.93	0.29	3.11	0.81-12.03	0.099	3.66	0.99-13.47	0.051	9.18	1.80-46.76	0.0076
	C	0.19091	0.3212	N/A	N/A	0.5951	0.25-1.41	0.2393	1.01	1.00-1.01	0.0969	N/A	N/A	N/A	N/A	N/A	N/A	N/A	N/A	N/A	N/A	N/A	N/A
R6	A	-0.44125	0.01016	-0.186693	0.3232	1.277	0.88-1.86	0.198	1.003	1.00-1.01	0.348	1.95	0.63-6.00	0.25	2.31	0.81-6.58	0.12	1.74	0.73-4.14	0.21	2.89	1.12-7.46	0.028
	B	-0.489284	0.002855	-0.331776	0.07327	2.226	1.16-4.28	0.0162	1.01	1.00-1.03	0.068	1.68	0.39-7.11	0.48	2.73	0.63-11.82	0.18	3.83	0.88-16.69	0.074	11.07	1.87-65.55	0.0081
	C	0.263087	0.1679	N/A	N/A	0.4204	0.12-1.48	0.1774	1.01	1.00-1.01	0.0653	N/A	N/A	N/A	N/A	N/A	N/A	N/A	N/A	N/A	N/A	N/A	N/A
R7	A	-0.311048	0.07808	0.0398309	0.8345	1.243	0.91-1.70	0.171	1.003	1.00-1.01	0.329	2.06	0.87-4.88	0.1	2.36	1.05-5.33	0.05	1.49	0.78-2.83	0.23	1.48	0.81-2.67	0.2
	B	-0.3712	0.02813	-0.0358255	0.8509	1.259	0.94-1.68	0.118	1.02	1.00-1.03	0.0194	3.29	0.63-17.32	0.16	4.7	0.88-25.05	0.07	1.98	0.73-5.40	0.18	1.68	0.78-3.60	0.19
	C	0.293879	0.1218	N/A	N/A	0.9086	0.64-1.28	0.587	1.01	1.00-1.01	0.103	N/A	N/A	N/A	N/A	N/A	N/A	N/A	N/A	N/A	N/A	N/A	N/A
R8	A	-0.44593	0.009295	-0.155096	0.4131	1.244	0.88-1.75	0.21	1.003	1.00-1.01	0.353	2.09	0.73-5.97	0.17	2.59	0.94-7.13	0.065	1.97	0.86-4.53	0.11	2.77	1.16-6.58	0.021
	B	-0.533408	0.0009683	-0.384958	0.03567	2.036	1.14-3.64	0.0164	1.01	1.00-1.03	0.1096	2.23	0.45-11.17	0.33	3.13	0.66-14.84	0.15	4.94	1.00-24.36	0.05	8.77	1.69-45.51	0.0097
	C	0.216036	0.2603	N/A	N/A	1.8046	0.20-1.51	0.2496	1.01	1.00-1.01	0.0797	N/A	N/A	N/A	N/A	N/A	N/A	N/A	N/A	N/A	N/A	N/A	N/A
R10	A	-0.475347	0.00518	-0.231642	0.2181	1.375	0.912-2.07	0.129	1.003	1.00-1.01	0.28	2.23	0.65-7.59	0.2	3.88	1.01-14.89	0.048	2.6	0.92-7.31	0.071	5.14	1.50-17.62	0.0093
	B	-0.539711	0.0008196	-0.395194	0.03066	2.246	1.178-4.28	0.0141	1.01	1.00-1.03	0.078	2.31	0.45-11.82	0.31	3.68	0.73-18.53	0.11	4.61	0.95-22.25	0.057	14.1	1.99-100.11	0.0081
	C	0.124153	0.5211	N/A	N/A	0.5746	0.20-1.64	0.299	1	1.00-1.01	0.172	N/A	N/A	N/A	N/A	N/A	N/A	N/A	N/A	N/A	N/A	N/A	N/A
R11	A	-0.391108	0.02441	-0.109702	0.5639	1.214	0.85-1.74	0.292	1.003	1.00-1.01	0.322	1.59	0.60-4.25	0.35	1.96	0.78-4.91	0.15	1.57	0.71-3.48	0.26	2.46	1.04-5.83	0.041
	B	-0.614512	8.593e-05	-0.329551	0.07534	2.515	1.28-4.93	0.00726	1.01	1.00-1.03	0.16217	3.34	0.72-15.59	0.12	4.12	0.97-17.47	0.054	6.07	1.36-27.05	0.018	14.93	2.44-91.51	0.0035
	C	0.221948	0.2472	N/A	N/A	0.4836	0.15-1.54	0.2186	1.01	1.00-1.01	0.0686	N/A	N/A	N/A	N/A	N/A	N/A	N/A	N/A	N/A	N/A	N/A	N/A
N/A = Not applicable
HR = Hazards ratio
OR = Odds ratio
CI = Confidence interval
P<0.05

## Sheet: Table_S4
Supplementary table 4: Cox proportional hazards analysis of changes in methylation levels between visits
		Cox proportional hazards analysis for TTCP
Region	Variable	HR	95% CI	P-value
R1	B/A ratio	0.9653	0.806-1.156	0.701
	C/B ratio	0.7883	0.6418-0.9682	0.0234
	C/A ratio	0.9623	0.9004-1.029	0.258
R2	B/A ratio	0.967	0.8469-1.104	0.619
	C/B ratio	0.7766	0.5981-1.008	0.0578
	C/A ratio	0.9591	0.8985-1.024	0.21
R3	B/A ratio	1	0.8638-1.158	0.997
	C/B ratio	0.7999	0.6359-1.006	0.0565
	C/A ratio	0.9714	0.9184-1.027	0.309
R5	B/A ratio	1.011	0.8532-1.198	0.9
	C/B ratio	0.8375	0.6713-1.045	0.116
	C/A ratio	0.9739	0.916-1.035	0.397
R6	B/A ratio	0.9894	0.8362-1.171	0.901
	C/B ratio	0.8237	0.6703-1.012	0.065
	C/A ratio	0.9626	0.8966-1.034	0.293
R7	B/A ratio	1.019	0.8478-1.224	0.843
	C/B ratio	0.8402	0.677-1.043	0.114
	C/A ratio	0.9657	0.9022-1.034	0.315
R8	B/A ratio	0.971	0.8042-1.172	0.76
	C/B ratio	0.7761	0.6007-1.003	0.0524
	C/A ratio	0.9677	0.9098-1.029	0.297
R10	B/A ratio	1	0.8168-1.225	0.998
	C/B ratio	0.741	0.5774-0.9509	0.0185
	C/A ratio	0.9496	0.8652-1.042	0.277
R11	B/A ratio	1.06	0.8799-1.278	0.538
	C/B ratio	0.752	0.5902-0.958	0.0211
	C/A ratio	0.9748	0.9189-1.034	0.398
HR = Hazards ratio
CI = Confidence interval
P<0.05
